# Supplementary material for: Titanium biomaterials with complex surfaces induced aberrant peripheral circadian rhythms in bone marrow mesenchymal stromal cells
Source: PubMed Central journal article supplement (PMC5560683; doi:10.1371/journal.pone.0183359), 2017-08-17

**Hassan et al. Titanium biomaterials with complex surfaces induced aberrant peripheral circadian rhythms in bone marrow mesenchymal stromal cells**

**S3 Fig.** The cell viability test of BMSC in the luminometer culture condition. The moderate decrease of cell viability was unlikely to be the major cause of *Per1::luc* expression modulation in the B-DAE-DCD group.

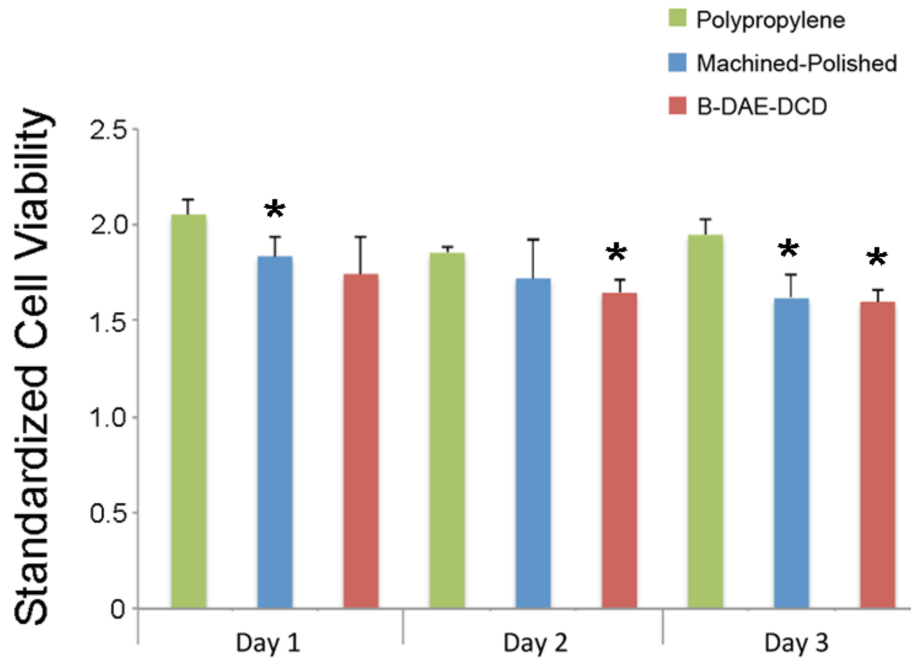

Supplement: pone.0183359.s003.pdf [file pone.0183359.s003.pdf]
