# Supplementary material for: Titanium biomaterials with complex surfaces induced aberrant peripheral circadian rhythms in bone marrow mesenchymal stromal cells
Source: PubMed Central journal article supplement (PMC5560683; doi:10.1371/journal.pone.0183359), 2017-08-17
Supplement: pone.0183359.s005.pdf [file pone.0183359.s005.pdf]

## Hassan et al. Titanium biomaterials with complex surfaces induced aberrant peripheral circadian rhythms in bone marrow mesenchymal stromal cells

**S1 Table** Cosinor-based rhythmometry analysis of circadian rhythm gene expression in human BMSC cultured on polypropylene dish, machined Ti disc or B-DAE-DCD disc (24h fixed cosine curve)

|                           | <i>Per1</i>   |          |           |
|---------------------------|---------------|----------|-----------|
|                           | Polypropylene | Machined | B-DAE-DCD |
| <b>Amplitude</b>          | 0.3206        | 0.1629   | 0.2288    |
| <b>Acrophase (degree)</b> | 178           | 180      | 225       |
| <b>Acrophase (hour)</b>   | 15.84         | 16       | 19.01     |

  

|                           | <i>Per2</i>   |          |           |
|---------------------------|---------------|----------|-----------|
|                           | Polypropylene | Machined | B-DAE-DCD |
| <b>Amplitude</b>          | 0.5684        | 0.4021   | 0.8095    |
| <b>Acrophase (degree)</b> | 217           | 233      | 258       |
| <b>Acrophase (hour)</b>   | 18.45         | 19.52    | 21.19     |

  

|                           | <i>Per3</i>   |          |           |
|---------------------------|---------------|----------|-----------|
|                           | Polypropylene | Machined | B-DAE-DCD |
| <b>Amplitude</b>          | 0.5539        | 0.3104   | 0.6788    |
| <b>Acrophase (degree)</b> | 207           | 208      | 249       |
| <b>Acrophase (hour)</b>   | 17.79         | 17.84    | 20.58     |
