# Supplementary material for: Titanium biomaterials with complex surfaces induced aberrant peripheral circadian rhythms in bone marrow mesenchymal stromal cells
Source: PubMed Central journal article supplement (PMC5560683; doi:10.1371/journal.pone.0183359), 2017-08-17
Supplement: pone.0183359.s006.pdf [file pone.0183359.s006.pdf]

## Hassan et al. Titanium biomaterials with complex surfaces induced aberrant peripheral circadian rhythms in bone marrow mesenchymal stromal cells

**S2 Table** Hub genes in Blue module

| Gene ID                                | Gene Name | Number of Connections | Protein Function                               |
|----------------------------------------|-----------|-----------------------|------------------------------------------------|
| A_44_P214873                           | Arntl     | 23                    |                                                |
| A_44_P364620, A_43_P12768              | Bhlhe40   | 41, 42                |                                                |
| A_43_P15357                            | Bhlhe41   | 36                    |                                                |
| A_43_P15473                            | Clock     | 22                    | Circadian rhythm, E-box binding                |
| A_42_P515454, A_44_P192988             | Csnk1e    | 26, 26                |                                                |
| A_44_P405793                           | Npas2     | 32                    |                                                |
| A_44_P264477                           | Pacsin1   | 34                    |                                                |
| A_44_P175041                           | Nr1d1     | 30                    |                                                |
| A_44_P395572                           | Nr1d2     | 29                    |                                                |
| A_43_P14310                            | Nr2f1     | 24                    |                                                |
| A_44_P421333                           | Nr2f2     | 25                    |                                                |
| A_44_P243231                           | Nr2f6     | 42                    | Nuclear steroid hormone receptors, DNA binding |
| A_44_P522524                           | Nr4a2     | 44                    |                                                |
| A_44_P654444, A_43_P12619, A_43_P11932 | Nr4a3     | 43, 38, 31            |                                                |
| A_44_P250983, A_44_P191287             | Nrbp2     | 42, 42                |                                                |
| A_42_P812008                           | P8        | 37                    |                                                |
| A_44_P468153                           | Thrb      | 28                    |                                                |
| A_44_P276492                           | Vdr       | 35                    | Vitamin D related                              |
| A_44_P118625                           | Calb1     | 41                    |                                                |
| A_43_P15847                            | Cyp27a1   | 31                    |                                                |
| A_43_P12154                            | Acan      | 25                    |                                                |
| A_43_P11684                            | Alpl      | 43                    |                                                |
| A_44_P295789                           | Comp      | 28                    | Cartilage-related extracellular matrix         |
| A_42_P636281                           | Dmp1      | 35                    |                                                |
| A_44_P241156, A_44_P357420             | Mamdc2    | 42, 43                |                                                |
| A_44_P322497                           | Serpinh1  | 44                    |                                                |
| A_44_P515798                           | Ucma      | 13                    |                                                |
| A_43_P10333                            | Efemp1    | 25                    |                                                |
| A_42_P669820                           | Efemp2    | 43                    |                                                |
| A_42_P623839, A_44_P271347             | Frem1     | 41, 42                |                                                |
| A_42_P624773                           | Cpz       | 32                    |                                                |
| A_42_P527961                           | Pmch      | 30                    | Others                                         |
| A_43_P13420, A_44_P233867              | Spon1     | 21, 26                |                                                |
| A_44_P421417                           | Spon2     | 35                    |                                                |
| A_44_P321176                           | Hr        | 26                    |                                                |
| A_44_P1029131                          | Il33      | 22                    |                                                |
