# Supplementary material for: Titanium biomaterials with complex surfaces induced aberrant peripheral circadian rhythms in bone marrow mesenchymal stromal cells
Source: PubMed Central journal article supplement (PMC5560683; doi:10.1371/journal.pone.0183359), 2017-08-17
Supplement: pone.0183359.s007.pdf [file pone.0183359.s007.pdf]

**Hassan et al. Titanium biomaterials with complex surfaces induced aberrant peripheral circadian rhythms in bone marrow mesenchymal stromal cells**

**S3 Table** Kyoto Encyclopedia of Genes and Genomes (KEGG) analysis of Blue module hub genes

| <b>#pathway ID</b> | <b>pathway description</b> | <b>observed gene count</b> | <b>false discovery rate</b> | <b>matching proteins in your network (labels)</b> |
|--------------------|----------------------------|----------------------------|-----------------------------|---------------------------------------------------|
| 4710               | Circadian rhythm           | 7                          | 5.10E-12                    | Arntl,Bhlhe40,Bhlhe41,Clock,Csnk1e,Npas2,Nr1d1    |
