# Supplementary material for: Titanium biomaterials with complex surfaces induced aberrant peripheral circadian rhythms in bone marrow mesenchymal stromal cells
Source: PubMed Central journal article supplement (PMC5560683; doi:10.1371/journal.pone.0183359), 2017-08-17
Supplement: pone.0183359.s008.pdf [file pone.0183359.s008.pdf]

**Hassan et al. Titanium biomaterials with complex surfaces induced aberrant peripheral circadian rhythms in bone marrow mesenchymal stromal cells**

**S4 Table:** Gene ontology analysis (Function) of Blue module hub genes

| #pathway ID | pathway description                                                                             | observed gene count | false discovery rate | matching proteins in your network (labels)                                                             |
|-------------|-------------------------------------------------------------------------------------------------|---------------------|----------------------|--------------------------------------------------------------------------------------------------------|
| GO.0003707  | steroid hormone receptor activity                                                               | 8                   | 3.21E-12             | Nr1d1,Nr1d2,Nr2f2,Nr2f6,Nr4a2,Nr4a3,Thrb,Vdr                                                           |
| GO.0004879  | RNA polymerase II transcription factor activity, ligand-activated sequence-specific DNA binding | 6                   | 2.88E-09             | Nr2f2,Nr2f6,Nr4a2,Nr4a3,Thrb,Vdr                                                                       |
| GO.0043565  | sequence-specific DNA binding                                                                   | 10                  | 9.15E-09             | Arntl,Clock,Nr1d1,Nr1d2,Nr2f2,Nr2f6,Nr4a2,Nr4a3,Thrb,Vdr                                               |
| GO.0003700  | transcription factor activity, sequence-specific DNA binding                                    | 9                   | 1.27E-07             | Arntl,Clock,Nr1d1,Nr1d2,Nr2f2,Nr4a2,Nr4a3,Thrb,Vdr                                                     |
| GO.0046872  | metal ion binding                                                                               | 16                  | 2.89E-07             | Acan,Alpl,Comp,Cpz,Cyp27a1,Efemp1,Hr,Nr1d1,Nr1d2,Nr2f2,Nr2f6,Nr4a2,Nr4a3,Spon2,Thrb,Vdr                |
| GO.0008270  | zinc ion binding                                                                                | 10                  | 3.24E-07             | Calb1,Cpz,Nr1d1,Nr1d2,Nr2f2,Nr2f6,Nr4a2,Nr4a3,Thrb,Vdr                                                 |
| GO.0046914  | transition metal ion binding                                                                    | 11                  | 3.93E-07             | Calb1,Cpz,Cyp27a1,Nr1d1,Nr1d2,Nr2f2,Nr2f6,Nr4a2,Nr4a3,Thrb,Vdr                                         |
| GO.0003677  | DNA binding                                                                                     | 10                  | 6.03E-06             | Arntl,Bhlhe40,Clock,Hr,Nr1d1,Nr1d2,Nr2f2,Nr2f6,Nr4a2,Vdr                                               |
| GO.0005499  | vitamin D binding                                                                               | 3                   | 1.07E-05             | Calb1,Comp,Vdr                                                                                         |
| GO.0043167  | ion binding                                                                                     | 17                  | 2.06E-05             | Acan,Alpl,Comp,Cpz,Cxcl10,Cyp27a1,Efemp1,Hr,Nr1d1,Nr1d2,Nr2f2,Nr2f6,Nr4a2,Nr4a3,Pacsin1,Spon2,Thrb,Vdr |

**Hassan et al. Titanium biomaterials with complex surfaces induced aberrant peripheral circadian rhythms in bone marrow mesenchymal stromal cells**

|                |                                                                        |    |          |                                                                             |
|----------------|------------------------------------------------------------------------|----|----------|-----------------------------------------------------------------------------|
| GO.0044<br>212 | transcription<br>regulatory region<br>DNA binding                      | 6  | 7.97E-05 | Arntl,Bhlhe40,Clock,Nr1d1,Nr1d2,Nr4a2                                       |
| GO.0004<br>871 | signal transducer<br>activity                                          | 9  | 0.000111 | Arntl,Clock,Efemp1,Nr1d1,Nr1d2,Nr2f2,Nr2f6,Nr4a2,Nr4a3                      |
| GO.0001<br>047 | core promoter<br>binding                                               | 4  | 0.000156 | Arntl,Clock,Nr1d1,Nr1d2                                                     |
| GO.0070<br>888 | E-box binding                                                          | 3  | 0.000493 | Arntl,Bhlhe40,Clock                                                         |
| GO.0097<br>159 | organic cyclic<br>compound binding                                     | 13 | 0.00173  | Arntl,Bhlhe40,Calb1,Clock,Comp,Cyp27a1,Hr,Nr1d1,Nr1d2,Nr2f2,Nr2f6,Nr4a2,Vdr |
| GO.0038<br>023 | signaling receptor<br>activity                                         | 7  | 0.00229  | Efemp1,Nr1d1,Nr1d2,Nr2f2,Nr2f6,Nr4a2,Nr4a3                                  |
| GO.0000<br>976 | transcription<br>regulatory region<br>sequence-specific<br>DNA binding | 4  | 0.00829  | Arntl,Nr1d1,Nr1d2,Nr4a2                                                     |
| GO.0005<br>102 | receptor binding                                                       | 6  | 0.014    | Cxcl10,Efemp1,Hr,Ill33,Pmch,Spon2                                           |
| GO.0005<br>515 | protein binding                                                        | 11 | 0.0181   | Comp,Cxcl10,Efemp1,Hr,Ill33,Nr1d1,Pacsin1,Pmch,Serpinh1,Spon2,Thrb          |
| GO.0008<br>289 | lipid binding                                                          | 5  | 0.0181   | Calb1,Comp,Nr2f2,Pacsin1,Vdr                                                |
| GO.1901<br>363 | heterocyclic<br>compound binding                                       | 11 | 0.0266   | Arntl,Bhlhe40,Clock,Cyp27a1,Hr,Nr1d1,Nr1d2,Nr2f2,Nr2f6,Nr4a2,Vdr            |
| GO.0005<br>539 | glycosaminoglycan<br>binding                                           | 3  | 0.046    | Acan,Comp,Cxcl10                                                            |
