# Supplementary material for: Titanium biomaterials with complex surfaces induced aberrant peripheral circadian rhythms in bone marrow mesenchymal stromal cells
Source: PubMed Central journal article supplement (PMC5560683; doi:10.1371/journal.pone.0183359), 2017-08-17
Supplement: pone.0183359.s009.pdf [file pone.0183359.s009.pdf]

**Hassan et al. Titanium biomaterials with complex surfaces induced aberrant peripheral circadian rhythms in bone marrow mesenchymal stromal cells**

**S5 Table** ITV+ vs. OSV+ trait comparison. \*: p<0.05

| <b>Modlule</b>   | <b>Trait</b> | <b>p value</b> |
|------------------|--------------|----------------|
| Blue             | 0.96         | 0.0004*        |
| Yellow 4         | 0.78         | 0.02*          |
| Light green      | 0.64         | 0.09           |
| Bisque 4         | 0.6          | 0.1            |
| Dark seagreen 4  | 0.58         | 0.1            |
| Sienna 3         | 0.58         | 0.1            |
| Black            | 0.57         | 0.1            |
| Green            | 0.56         | 0.1            |
| Pink             | 0.55         | 0.2            |
| Dark orange 2    | 0.51         | 0.2            |
| Light cyan       | 0.47         | 0.2            |
| Thistle 2        | 0.46         | 0.3            |
| Dark grey        | 0.39         | 0.3            |
| Antique white 4  | 0.38         | 0.4            |
| Thistle 1        | 0.33         | 0.4            |
| Royal blue       | 0.3          | 0.5            |
| Light yellow     | 0.29         | 0.5            |
| Honeydew 1       | 0.29         | 0.5            |
| Navaho white 2   | 0.27         | 0.5            |
| Maroon           | 0.25         | 0.6            |
| Red              | 0.24         | 0.6            |
| Dark magenta     | 0.23         | 0.6            |
| Skyblue          | 0.23         | 0.6            |
| Floral white     | 0.22         | 0.6            |
| Medium orchid    | 0.21         | 0.6            |
| Dark red         | 0.21         | 0.6            |
| Skyblue 2        | 0.21         | 0.6            |
| Light cyan 1     | 0.2          | 0.6            |
| Dark turquoise   | 0.2          | 0.6            |
| Violet           | 0.11         | 0.8            |
| Dark slateblue   | -0.015       | 1              |
| Coral 1          | -0.07        | 0.9            |
| Salmon           | -0.077       | 0.9            |
| Salmon 4         | -0.08        | 0.9            |
| Lavender blush 3 | -0.084       | 0.8            |
| Orange           | -0.089       | 0.8            |
| Ivory            | -0.091       | 0.8            |
| Plum 1           | -0.11        | 0.8            |
| Pale turquoise   | -0.17        | 0.7            |

**Hassan et al. Titanium biomaterials with complex surfaces induced aberrant peripheral circadian rhythms in bone marrow mesenchymal stromal cells**

|                    |       |           |
|--------------------|-------|-----------|
| Orange red 4       | -0.2  | 0.6       |
| Grey               | -0.22 | 0.6       |
| Midnight blue      | -0.23 | 0.6       |
| Brown 4            | -0.23 | 0.6       |
| Brown              | -0.23 | 0.6       |
| Pale violet red 3  | -0.25 | 0.6       |
| Medium purple 3    | -0.25 | 0.6       |
| Purple             | -0.28 | 0.5       |
| Yellow green       | -0.32 | 0.4       |
| Dark green         | -0.33 | 0.4       |
| White              | -0.42 | 0.3       |
| Light Steel blue 1 | -0.43 | 0.3       |
| Plum 2             | -0.43 | 0.3       |
| Tan                | -0.43 | 0.3       |
| Magenta            | -0.44 | 0.3       |
| Dark orange        | -0.45 | 0.3       |
| Light pink 4       | -0.46 | 0.2       |
| Dark olive green   | -0.46 | 0.2       |
| Steelblue          | -0.46 | 0.2       |
| Cyan               | -0.47 | 0.2       |
| Coral 2            | -0.51 | 0.2       |
| Green yellow       | -0.52 | 0.2       |
| Yellow             | -0.55 | 0.2       |
| Saddle brown       | -0.61 | 0.1       |
| Skyblue 3          | -0.65 | 0.08      |
| Grey 60            | -0.8  | 0.02*     |
| turquoise          | -0.94 | 0.000004* |
