# Supplementary material for: Titanium biomaterials with complex surfaces induced aberrant peripheral circadian rhythms in bone marrow mesenchymal stromal cells
Source: PubMed Central journal article supplement (PMC5560683; doi:10.1371/journal.pone.0183359), 2017-08-17
Supplement: pone.0183359.s010.pdf [file pone.0183359.s010.pdf]

**Hassan et al. Titanium biomaterials with complex surfaces induced aberrant peripheral circadian rhythms in bone marrow mesenchymal stromal cells**

**S6 Table** ITV+ vs. ITV- trait comparison. \*: p<0.05

| Module            | Trait   | p value |
|-------------------|---------|---------|
| Dark turquoise    | 0.83    | 0.01*   |
| Blue              | 0.63    | 0.09    |
| Green             | 0.59    | 0.1     |
| Green yellow      | 0.58    | 0.1     |
| Pink              | 0.56    | 0.1     |
| Magenta           | 0.55    | 0.2     |
| Light cyan        | 0.55    | 0.2     |
| Salmon            | 0.53    | 0.2     |
| Tan               | 0.52    | 0.2     |
| Pale turquoise    | 0.51    | 0.2     |
| Plum 1            | 0.44    | 0.3     |
| Dark orange       | 0.41    | 0.3     |
| Navajo white 2    | 0.38    | 0.4     |
| Saddle brown      | 0.36    | 0.4     |
| Maroon            | 0.34    | 0.4     |
| Skyblue 2         | 0.34    | 0.4     |
| Antique white 4   | 0.32    | 0.4     |
| Bisque 4          | 0.29    | 0.5     |
| Light green       | 0.26    | 0.5     |
| Medium orchid     | 0.25    | 0.6     |
| Plum 2            | 0.22    | 0.6     |
| Brown 4           | 0.2     | 0.6     |
| Dark slate blue   | 0.2     | 0.6     |
| Skyblue           | 0.17    | 0.7     |
| Brown             | 0.16    | 0.7     |
| Light yellow      | 0.14    | 0.7     |
| Medium purple 2   | 0.14    | 0.7     |
| Light steele blue | 0.12    | 0.8     |
| Medium purple 3   | 0.11    | 0.8     |
| Plum              | 0.089   | 0.8     |
| Dark olive green  | 0.062   | 0.9     |
| Grey 60           | 0.056   | 0.9     |
| Orange red 4      | 0.053   | 0.9     |
| Coral 2           | 0.051   | 0.9     |
| Light cyan 1      | -0.0014 | 1       |
| Dark sea green 4  | -0.026  | 1       |
| Yellow            | -0.063  | 0.9     |
| Lavender blush 3  | -0.074  | 0.9     |
| Coral 1           | -0.086  | 1       |

**Hassan et al. Titanium biomaterials with complex surfaces induced aberrant peripheral circadian rhythms in bone marrow mesenchymal stromal cells**

|                    |       |         |
|--------------------|-------|---------|
| Violet             | -0.1  | 0.8     |
| Dark orange 2      | -0.12 | 0.8     |
| Dark grey          | -0.12 | 0.8     |
| Dark magenta       | -0.14 | 0.7     |
| Skyblue 1          | -0.15 | 0.7     |
| Dark green         | -0.16 | 0.7     |
| Orange             | -0.19 | 0.6     |
| Grey               | -0.22 | 0.6     |
| Sky blue 3         | -0.23 | 0.6     |
| Light pink 4       | -0.23 | 0.6     |
| Black              | -0.24 | 0.6     |
| Midnight blue      | -0.26 | 0.5     |
| Thistle 1          | -0.35 | 0.4     |
| Orange red 3       | -0.35 | 0.4     |
| Steel blue         | -0.37 | 0.4     |
| Floral white       | -0.38 | 0.4     |
| Light steel blue 1 | -0.39 | 0.3     |
| Dark red           | -0.42 | 0.3     |
| Sienna 3           | -0.43 | 0.3     |
| Royal blue         | -0.47 | 0.2     |
| Yellow 4           | -0.48 | 0.2     |
| Yellow green       | -0.48 | 0.2     |
| Thistle 2          | -0.49 | 0.2     |
| Red                | -0.5  | 0.2     |
| Hoeydew 1          | -0.5  | 0.2     |
| Salmon 4           | -0.55 | 0.2     |
| Turquoise          | -0.6  | 0.1     |
| Pale violet red 3  | -0.65 | 0.08    |
| White              | -0.66 | 0.07    |
| Cyan               | -0.75 | 0.03*   |
| Ivory              | -0.83 | 0.01*   |
| Purple             | -0.95 | 0.0004* |
